# Supplementary material for: Clinical and Parasitological Protection in a Leishmania infantum-Macaque Model Vaccinated with Adenovirus and the Recombinant A2 Antigen
Source: PLoS Negl Trop Dis. 2014 Jun 19;8(6):e2853. doi: 10.1371/journal.pntd.0002853 (PMC4063746; doi:10.1371/journal.pntd.0002853)
Supplement: Table S1 — Clinical and laboratorial analysis of vaccinated and non-vaccinated primates prior and after challenge with L. infantum. Spreadsheet containing all the individual values for temperature, body weight, hemogram and biochemical tests for each macaque. (XLSX) [file pntd.0002853.s002.xlsx]

## Sheet: Temperature
Body Temparature (C)
Day of experiment	104	125	146	188	230	272
Weeks post-infection	0 (Challenge)	3	6	12	18	24
Animal Code
PBS
G20	38	38.9	38.3	38.3	38.7	38.9
U36	38	39.5	40.5	39	39.2	39.8
Z29	39.9	39.7	39.9	39.5	39.5	39.1
Mean	38.77	39.37	39.57	38.93	39.13
SD	1	0.42	1.14	0.6	0.4
rA2/rhIL-12/alum
P36	38.3	38.4	38.2	38.3	38.3	38
X32	39.1	39.1	38.6	39.1	38.7	38.8
AA45	39	39.4	39.3	39	39.7	39
Z81	39.2	38.7	38.8	38.6	38.2	n.d.
V1	39.5	39.4	39.6	39.8	39.7	38.5
Mean	39.06	39.04	39	38.96	39.16
SD	0.45	0.42	0.58	0.57	0.59
rhIL-12/alum
S68	38.1	37.8	38	38.3	38.4	37.8
Q58	39	39.9	38.9	38.9	39.2	38.9
Z47	39.2	39.8	39.8	38.9	39.1	38.9
V41	39.7	39.6	39.8	39.5	39.9	39.5
X83	39.1	39.2	39.4	39.2	39.3	38.9
Mean	39.02	39.26	39.12	38.94	39.18
SD	0.58	0.86	0.79	0.45	0.54
Ad5-A2+rA2/rhIL-12/alum
Z61	39.2	39.2	39.8	39.5	39.5	38.6
T16	39.1	39.4	39.4	39	38.6	38.7
V90	38.8	39.7	39.1	38.8	38.8	38.8
U77	39.5	40	40.6	39.6	39.4	38.8
V59	39	38.9	39.2	39.4	39.7	38.7
Mean	39.12	39.44	39.62	39.26	39.2
SD	0.26	0.43	0.61	0.34	0.47
Ad5-ASP+rhIL-12/alum
S38	38	38.9	39.2	39.3	39.1	39.3
Z73	39.7	39.5	39.1	39.8	39.6	39.7
Z33	38.6	38.9	39.1	38.5	38.2	38.7
N40	39	39.1	38.8	39.4	39.1	38.9
V17	39.6	39.8	39.3	39.1	39.2	38.9
Mean	39.12	39.24	39.1	39.22	39.04
SD	0.51	0.4	0.19	0.48	0.51
DNA-A2+rAd5-A2
T10	38.9	38.6	38.9	38.5	38	37.9
Z79	39.7	39.8	39.7	39.3	39	39.3
U20	38.7	39	39.2	39.1	39	38.9
V76	39.7	39.1	39.7	39	39	38.9
Z17	39.5	39.6	39.3	39.6	39.5	38.6
Mean	39.3	39.22	39.36	39.1	39.04
SD	0.47	0.48	0.34	0.41	0.61
DNA-wt+Ad5-ASP
X20	38	39.3	40.2	39.1	39.3	37.9
AA5	39.1	39.2	39.5	39.5	39.3	39
N14	38.1	39.1	38.4	38.6	39.2	38.1
M18	38.9	38.7	38.3	39.2	39	38.9
U31	40.1	39.6	40.6	40	40	39.6
Mean	39.1	39.18	39.4	39.28	39.36
SD	0.58	0.33	1.04	0.52	0.38
Observação: Considerando os valores de referência quanto à temperatura retal para Macaca mulata (que oscilam entre 36.8 e 38.8 0C), apenas dois macacos (G2_P36 e G3_S68) mantiveram a temperatura corporal em níveis fisiológicos. Embora o restante tenha desenvolvido febre mesmo antes do desafio (efeito sistêmico adverso da vacinação?), a temperatura manteve-se geralmente elevada (cujos valores estã…

## Sheet: Body Weight
Body Weight (kg)
Day of experiment	0	93	104	125	146	188	230	272
Weeks post-infection			0 (Challenge)	3	6	12	18	24
Animal Code
PBS
G20	8.1	6.8	6.7	6.6	6.8	6.5	6.6	7.2
U36	4.5	4.8	4.8	4.9	4.9	4.8	5	5
Z29	4.4	5.3	5.4	5.4	5.4	5.2	4.8	7.4
Mean	5.65	5.6	5.62	5.62	5.68	5.47	5.43	6.52
SD	2.12	1.07	0.99	0.89	1.01	0.87	0.98	1.36
rA2/rhIL-12/alum
P36	8.1	5.9	5.7	5.7	6	5.6	5.9	5.8
X32	5.5	5.3	5.3	5.3	5.3	5.3	5.6	6.1
AA45	2.9	4.3	4.3	4.3	4.2	4.2	4.3	4.8
Z81	4.2	5.1	5.3	4.9	5.2	4.9	4.9
V1	5.2	7	7.3	6.7	6.8	7.1	7.6	8.5
Mean	5.2	5.5	5.57	5.35	5.5	5.4	5.63	6.29
SD	1.94	1	1.09	0.9	0.97	1.1	1.24	1.58
rhIL-12/alum
S68	5.6	5	5	4.9	4.8	4.7	5	4.9
Q58	9.3	6.8	6.6	6.5	6.6	6.3	6.2	6.7
Z47	5.2	5	5	4.9	4.9	5.2	5.6	6.3
V41	9.2	8	7.2	7.2	7.3	7.3	7.8	7.7
X83	4.4	7	6.8	6.7	6.7	6.4	6.8	7.2
Mean	6.73	6.33	6.09	6.01	6.04	5.96	6.23	6.52
SD	2.32	1.34	1.06	1.09	1.12	1.06	1.08	1.06
Ad5-A2+rA2/rhIL-12/alum
Z61	4.4	4.7	4.7	4.6	4.7	5.1	5.4	5.8
T16	6.6	5.9	5.9	5.9	5.8	5.9	5.9	6.1
V90	6.3	5.8	5.4	5.5	5.6	5.2	5.6	6.2
U77	9.9	8.6	8.3	8.4	8.6	8.2	8.6	9.5
V59	11	9.6	8.6	8.7	8.9	8.7	8.9	9.5
Mean	7.65	6.89	6.56	6.6	6.68	6.59	6.87	7.4
SD	2.73	2.08	1.75	1.82	1.9	1.71	1.73	1.9
Ad5-ASP+rhIL-12/alum
S38	6.4	5.2	5.3	5.2	5.2	5	5.1	5.4
Z73	4	3.9	3.9	4	4.1	4.3	4.2	4.8
Z33	4.8	5.3	5.3	5.3	5.3	5.1	5.3	6
N40	11.4	10.7	10.4	10	9	9.5	8.5	8.8
V17	8.3	8.4	8.4	8.3	8.4	8.3	8.2	9.4
Mean	6.99	6.69	6.65	6.54	6.38	6.41	6.23	6.87
SD	2.96	2.77	2.65	2.47	2.18	2.29	1.96	2.09
DNA-A2+Ad5-A2
T10	5.9	4.7	4.5	4.6	4.5	4.1	4.3	4.7
Z79	4.3	4.9	4.8	4.7	4.7	4.9	5.2	6
U20	6.7	5.6	5.5	5.5	5.3	5	5.2	5.6
V76	6.9	5.7	5.7	5.7	5.6	5.1	5.3	5.7
Z17	4.3	4.8	4.8	4.8	4.8	4.9	5.1	6
Mean	5.63	5.14	5.05	5.01	4.94	4.77	5	5.57
SD	1.26	0.47	0.51	0.5	0.45	0.39	0.4	0.55
DNA-wt+Ad5-ASP
X20	5.7	6.5	6.5	6.6	6.7	6.4	6.6	8.6
AA5	2.7	3.4	3.4	3.4	3.4	3.5	3.6	3.8
N14	9.5	8.5	8.5	8.3	8.1	7.7	7.2	7.5
M18	12.5	10.2	9.9	8.8	9.5	7.6	6.8	6.9
U31	9.8	8.9	8.6	8.5	8.8	8.7	8.1	9.9
Mean	8.04	7.49	7.36	7.09	7.27	6.75	6.44	7.33
SD	3.85	2.64	2.52	2.26	2.41	2.02	1.72	2.29
Observação: A perda de peso corporal ocorrida antes do desafio (dia 104) resultaria mais do confinamento (do que de um possível efeito adverso da vacinação) dos primatas. Em outros estudos no modelo Leishmania-Macaca mulatta, observamos que os animais depois de adaptados ao confinamento recuperam rapidamente esta perda (no caso, devido ao acúmulo de calorias resultante do rico regime alimentar ao…

## Sheet: Hemogram
Hemogram
Lab Test			Red Blood Cells (x 10E6/ml)								Hematocrit (%)								Hemoglobin (g/dL)								White Blood Cells (x 10E3/mm3)								Lymphocyte (%)
Day of experiment	104	125	146	188	230	272			104	125	146	188	230	272			104	125	146	188	230	272			104	125	146	188	230	272			104	125	146	188	230	272
Weeks post-infection	0 (Challenge)	3	6	12	18	24			0 (Challenge)	3	6	12	18	24			0 (Challenge)	3	6	12	18	24			0 (Challenge)	3	6	12	18	24			0 (Challenge)	3	6	12	18	24
Animal Code								Animal Code								Animal Code								Animal Code								Animal Code
PBS								PBS								PBS								PBS								PBS
G20	3.17	4.18	4.38	3.54	4.76	4.77		G20	22.8	29.7	30.8	22.6	28.5	30.2		G20	7.1	9.3	10	7	9.2	30.2		G20	2.3	2.9	3.4	2.6	2.9	8		G20	33	53	54	46	45	n.d.
U36	3.46	5.18	8.84	4.25	5.31	5.28		U36	25.2	37.7	33.6	28.4	34.4	36.7		U36	8.1	11.7	10.6	9	11.3	36.7		U36	3.8	5.9	8	7.1	8.2	7.4		U36	18	18	16	13	14	n.d.
Z29	5.48	5.41	4.57	4.5	5.87	5.68		Z29	40.1	39.4	32.7	31	39.1	39.4		Z29	12.7	12.4	10.7	9.6	12.6	39.4		Z29	8.4	9.7	5.1	12.6	17	15.3		Z29	65	23	23	73	27	n.d.
Mean	4.04	4.92	5.93	4.1	5.31	5.24		Mean	29.37	35.6	32.37	27.33	34	35.43		Mean	9.3	11.13	10.43	8.53	11.03	35.43		Mean	4.83	6.17	5.5	7.43	9.37	10.23		Mean	38.67	31.33	31	44	28.67
SD	1.3	0.7	2.5	0.5	0.6	0.5		SD	9.4	5.2	1.4	4.3	5.3	4.7		SD	3	1.6	0.4	1.4	1.7	4.7		SD	3.2	3.4	2.3	5	7.1	4.4		SD	24	18.9	20.2	30	15.6
rA2/rhIL-12/alum								rA2/rhIL-12/alum								rA2/rhIL-12/alum								rA2/rhIL-12/alum								rA2/rhIL-12/alum
P36	4.95	3.69	4.21	4.82	5.45	4.67		P36	36.3	26.1	30	32.8	35.7	30.6		P36	11.4	7.4	9.9	10.5	11.6	10		P36	3.8	2.7	5.1	4.8	8.8	11.4		P36	47	47	33	55	36	n.d.
X32	4.84	4.71	3.75	4.49	4.8	4.7		X32	35.7	34.6	26.5	29.7	30.3	30.5		X32	11.5	10.9	8.7	9.5	10	9.6		X32	7.9	7.5	4.5	6	6.4	11.6		X32	39	27	30	57	0	n.d.
AA45	5.43	5.19	4.88	3.92	5.43	5.47		AA45	37.5	35.7	32.9	24.3	33.5	34.9		AA45	11.9	11	10.6	7.8	10.9	11.3		AA45	11.2	8.6	6.2	4.1	10	10.8		AA45	61	52	44	41	21	n.d.
Z81	5.79	6.01	5.33	5.07	8.68			Z81	39.4	40.2	35.4	29.1	47.5			Z81	12.4	12.5	10.8	8.8	13.6			Z81	13.4	8.5	5.4	4.2	18			Z81	20	22	34	48	32	n.d.
V1	5.14	4.57	5.13	4.53	5.04	5		V1	37.6	33.1	37.3	30.3	35.1	34.5		V1	12	10.4	12.1	9.6	11.6	11.1		V1	7.2	6.4	6.9	7.3	9.3	15.3		V1	48	34	34	71	38	n.d.
Mean	5.23	4834	4.66	4.51	5.87	4.95		Mean	37.3	33.94	32.42	29.24	36.4	32.6		Mean	11.84	10.44	10.42	9.24	11.54	10.5		Mean	8.7	6.74	5.62	5.28	10.5	12.3		Mean	43	36.4	35	54.4	25.4
SD	0.4	0.9	0.7	0.5	1.6	0.4		SD	1.4	5.1	4.3	3.1	6.5	2.4		SD	0.4	1.9	1.2	1	1.3	0.8		SD	3.7	2.4	0.9	1.4	4.4	2		SD	15.1	12.8	5.3	11.2	15.6
rhIL-12/alum								rhIL-12/alum								rhIL-12/alum								rhIL-12/alum								rhIL-12/alum
S68	4.64	4.52	4.35	3.94	4.9	5.43		S68	33	31.9	28.9	22.9	25.1	22.1		S68	10.6	10.1	8.9	7.1	8	6.6		S68	5.5	3	2.7	2.8	3.7	4.1		S68	N/A	62	56	16	39	n.d.
Q58	4.97	4.86	5.32	4.41	4.95	5.16		Q58	35.5	34.4	37.5	28.3	29	30.9		Q58	11.5	10.8	12	8.8	9.2	9.7		Q58	5.4	3.4	3.9	3.7	4.1	5.9		Q58	40	46	37	52	42	n.d.
Z47	4.88	5.05	4.49	4.38	5.27	5.15		Z47	36.9	37.9	33.1	29.6	34.2	36		Z47	11.8	11.8	9.8	9.2	10.9	11.7		Z47	8	16.5	5.2	7.8	13.8	10.8		Z47	N/A	4	24	38	24	n.d.
V41	5.43	4.73	4.82	4.2	5.48	5.75		V41	40	34.6	35.3	29.1	36.3	39.6		V41	12.9	11	10.8	9.2	11.9	12.8		V41	6.8	6	5.6	1.4	9.6	9.5		V41	N/A	16	20	36	27	n.d.
X83	3.89	5	4.86	4.64	5.5	5.37		X83	27.7	35.4	33.9	30.2	34.7	36.1		X83	9	11.2	10.8	9.6	11.4	11.9		X83	9.3	4.6	4.6	6	6.7	5.8		X83	N/A	54	38	70	45	n.d.
Mean	4.76	4.83	4.77	4.31	5.21	5.37		Mean	34.62	34.84	33.74	28.02	31.86	32.94		Mean	11.16	10.98	10.46	8.78	10.28	10.54		Mean	7	6.7	4.4	4.34	7.58	7.22		Mean	40	36.4	35	42.4	35.4
SD	0.6	0.2	0.4	0.3	0.3	0.2		SD	4.6	2.2	3.2	2.9	4.7	6.8		SD	1.5	0.6	1.2	1	1.6	2.5		SD	1.7	5.6	1.1	2.6	4.2	2.8		SD	#DIV/0!	25.1	14.1	20.1	9.3
Ad5-A2+rA2/rhIL-12/alum								Ad5-A2+rA2/rhIL-12/alum								Ad5-A2+rA2/rhIL-12/alum								Ad5-A2+rA2/rhIL-12/alum								Ad5-A2+rA2/rhIL-12/alum
Z61	3.9	4.59	4.13	4.06	4.91	4.7		Z61	27.3	32.1	28.9	27.9	25.3	32		Z61	8.9	10.2	9.5	9.1	8	10.5		Z61	5.6	5.9	3.7	4.6	3.9	7.8		Z61	63	31	11	39	49	n.d.
T16	4.3	4.11	4.03	1.98	4.36	4.2		T16	31.4	30	28.9	13.4	28.4	29		T16	10.2	9.4	8.8	4.4	9.3	9.3		T16	7.5	3.7	4	2.6	7.1	6.9		T16	N/A	42	32	55	66	n.d.
V90	5.42	4.86	4.91	5.24	5.28	4.97		V90	39.5	35.1	34.8	28.6	33.9	33.7		V90	12.6	11	9.7	8.8	11.2	10.9		V90	5.7	4.4	3	5.4	6	8		V90	34	32	26	50	45	n.d.
U77	4.59	4.67	4.67	5.46	5.11	4.71		U77	33.1	34.1	32.8	30.6	33.5	32.3		U77	10.9	10.6	10.6	9.5	11.1	10.4		U77	4.9	4.1	4.8	7	6.6	8.2		U77	27	43	37	39	31	n.d.
V59	5.66	5.21	5.15	4.59	5.75	6.04		V59	40	36.9	36	30.7	37.1	40.8		V59	12.8	11.4	11.4	9.6	12	12.9		V59	8.7	6	4.4	4.8	5.8	8.6		V59	25	17	34	11	20	n.d.
Mean	4.77	4.69	4.58	3.87	5.08	4.92		Mean	34.26	33.64	32.28	26.24	31.64	33.56		Mean	11.08	10.52	10	8.28	10.32	10.8		Mean	6.48	4.82	3.78	4.88	5.88	7.9		Mean	37.25	33	28	38.8	42.2
SD	0.7	0.4	0.5	1.1	0.5	0.7		SD	5.4	2.7	3.3	7.3	4.7	4.4		SD	1.6	0.8	1	2.2	1.6	1.3		SD	1.6	1.1	0.5	1.6	1.2	0.6		SD	17.6	10.5	10.3	17	17.6
Ad5-ASP+rhIL-12/alum								Ad5-ASP+rhIL-12/alum								Ad5-ASP+rhIL-12/alum								Ad5-ASP+rhIL-12/alum								Ad5-ASP+rhIL-12/alum
S38	4.48	4.14	3.73	4.01	4.38	4.67		S38	33.1	30.1	26	25.7	27.5	32.3		S38	10.3	9.6	8.4	7.9	9.1	10.2		S38	5.3	3	3.4	5.1	4.5	6.3		S38	N/A	23	36	36	50	n.d.
Z73	4.85	4.82	4.51	4.06	5.26	5.3		Z73	36.3	34.3	33	23.9	29.4	33.6		Z73	11.8	10.6	11	7.4	9.6	10.9		Z73	6	3.9	5.9	3.6	8.8	8.7		Z73	45	57	46	57	33	n.d.
Z33	5.15	4.46	4.5	4.55	5	5.23		Z33	36.8	33.3	31	30.1	32	35.4		Z33	11.7	10.4	9.8	9.4	10.5	11.5		Z33	5.5	7.8	3.8	5.8	7.6	7.9		Z33	52	22	35	N/A	45	n.d.
N40	5.06	4.74	4.69	4.15	5.47	5.17		N40	36.1	33.5	32.8	24.2	29.7	32.4		N40	11.6	10.5	10.6	7.3	9.4	10.5		N40	5.4	4.4	3.3	2.3	4.4	5.4		N40	N/A	23	36	48	1	n.d.
V17	4.97	4.98	5.3	4.01	4.99	5.77		V17	37.7	37.6	40.2	28.6	34.5	41.2		V17	12.1	12.1	13.1	9	11.3	13.2		V17	6.8	7	7.7	8.4	11.2	13.4		V17	32	14	19	77	73	n.d.
Mean	4902	4628	4546	4156	5028	5228		Mean	36	33.76	32.6	26.5	30.62	34.98		Mean	11.5	10.64	10.58	8.2	9.98	11.26		Mean	5.8	5.22	4.82	5.04	7.3	8.34		Mean	43	27.8	34.4	54.5	40.2
SD	0.3	0.3	0.6	0.2	0.4	0.4		SD	1.7	2.7	5.1	2.7	2.7	3.69		SD	0.7	0.9	1.7	1	0.9	1.2		SD	0.6	2.1	1.9	2.3	2.9	3.1		SD	10.1	16.8	9.7	17.3	26.8
DNA-A2+Ad5-A2								DNA-A2+Ad5-A2								DNA-A2+Ad5-A2								DNA-A2+Ad5-A2								DNA-A2+Ad5-A2
T10	4.23	4.21	3.86	4.24	4.83	5.38		T10	29.3	28.6	23.5	22	23.7	30.2		T10	9.4	8.9	7.5	6.7	7.5	10.1		T10	7.5	5	3	3.5	5	8.1		T10	17	32	32	36	0	n.d.
Z79	5.04	5.19	4.47	4.64	5.74	5.71		Z79	34.1	34.5	29.3	29.6	35.1	36.7		Z79	10.7	10.9	9.5	9.2	11.6	12.1		Z79	4.2	5.4	4.4	5.3	9.1	13.2		Z79	N/A	24	25	28	37	n.d.
U20	4.99	4.97	4.31	4.28	4.68	5.3		U20	34.6	34.4	29.2	27.5	28.8	34.6		U20	11	10.7	9.1	8.6	9.1	11.6		U20	5.2	3.7	3	3.7	3.6	7.3		U20	N/A	36	39	33	29	n.d.
V76	4.77	4.45	4.69	3.83	4.51	4.98		V76	36.1	33.2	33.9	26	29.3	34.2		V76	11.7	10.6	11	8	9.4	11.7		V76	5.7	9.1	6.1	3.6	5.3	9.7		V76	N/A	10	16	70	38	n.d.
Z17	4.47	4.79	4.77	4.26	5.24	4.93		Z17	33.2	35.1	34.1	28.6	34	34.2		Z17	10.7	10.8	11.3	9.1	11	11.4		Z17	4.2	7.7	6.3	9.9	7.2	10.1		Z17	N/A	31	31	37	21	n.d.
Mean	4.7	4722	4.42	4.25	5	5.26		Mean	33.46	33.16	30	26.74	30.18	33.98		Mean	10.7	10.38	9.68	8.32	9.66	11.3		Mean	5.36	6.18	4.56	5.2	6.04	9.68		Mean	17	26.6	28.6	40.8	25
SD	0.3	0.4	0.4	0.3	0.5	0.3		SD	2.6	2.6	4.3	3	4.6	2.4		SD	0.8	0.8	1.5	1	1.5	0.7		SD	1.4	2.2	1.6	2.7	2.1	2.3		SD	#DIV/0!	10.2	8.6	16.7	15.6
DAN-wt+Ad5-ASP								DAN-wt+Ad5-ASP								DAN-wt+Ad5-ASP								DAN-wt+Ad5-ASP								DAN-wt+Ad5-ASP
X20	4.67	4.69	4.29	4.42	5.1	5.1		X20	33.6	33.2	28.1	29.2	31.9	33.9		X20	10.6	10.3	9	9	10.3	11.2		X20	5.5	4.7	4.8	18.7	13.6	10.2		X20	76	60	56	53	59	n.d.
AA5	amt.coag	4.87	4.83	4.46	5.31	5.82		AA5	amt.coag	34.3	33.4	29.1	32.7	38.6		AA5	amt.coag	10.8	10.9	9.1	10.4	12.5		AA5	amt.coag	8.1	7.1	13.1	15.6	15.1		AA5	amt.coag	15	28	N/A	40	n.d.
N14	5.13	5.11	4.12	3.67	4.43	5.37		N14	36.3	35.9	27.8	6.8	24.6	30.2		N14	11.6	11.8	9.3	21.9	7.9	9.5		N14	5.1	3.8	3.4	3.6	4.1	9.8		N14	43		44	56	26	n.d.
M18	4.19	3.84	3.81	3.75	4.15	3.38		M18	29.5	26	21.7	19.1	19.9	15.2		M18	9.3	7.9	6.7	5.8	6.3	4.8		M18	5.1	3.5	3.7	5.5	4.7	6.9		M18	41	41	23	N/A	0	n.d.
U31	4.84	4.28	4.1	3.8	4.9	4.99		U31	38.7	33.6	31.3	29	36.4	37.7		U31	12.5	10.8	10.1	9.4	12	12.3		U31	5.6	8.7	7.7	7.3	9	9.8		U31	N/A	20	23	35	21	n.d.
Mean	4.7	4.4	4	3.7	4.5	4.6		Mean	34.8	31.8	26.9	18.3	27	27.7		Mean	11.1	10	8.7	12.4	8.7	8.9		Mean	5.3	5.3	4.9	5.5	5.9	8.8		Mean	42	30.5	30	45.5	15.7
SD	0.4	0.5	0.4	0.4	0.5	0.9		SD	3.9	3.8	4.4	9.9	6.7	9.5		SD	1.4	1.3	1.6	6.2	2.3	3.2		SD	0.3	2.5	2	6.2	5.2	3		SD	19.7	20.7	14.7	11.4	22

## Sheet: Biochemical Tests
Biochemical Tests
Test			Aspartate Amino Transferase (IU/L)								Alanine Amino Transferase (IU/L)										Cholesterol (mg/dL)							Total Protein (mg/dL)								Albumin (mg/dL)							UREA (mg/dL)
Day of experiment	104	125	146	188	230	272			104	125	146	188	230	272			104	125	146	188	230	272			104	125	146	188	230	272			104	125	146	188	230	272			104	125	146	188	230	272
Weeks post-infection	0 (Challenge)	3	6	12	18	24			0 (Challenge)	3	6	12	18	24			0 (Challenge)	3	6	12	18	24			0 (Challenge)	3	6	12	18	24			0 (Challenge)	3	6	12	18	24			0 (Challenge)	3	6	12	18	24
Animal Code								Animal Code								Animal Code								Animal Code								Animal Code								Animal Code
PBS								PBS								PBS								PBS								PBS								PBS
G20	59	52	64	89	86	n.d.		G20	101	108	85	80	87	n.d.		G20	156	152	167	167		n.d.		G20	6.3	7.8	7.5	7.6	6.8	n.d.		G20	4.1	4.5	4.3	3.9	3.7	n.d.		G20	39	38.8	40.3	37.9	33.9	n.d.
U36	83	51	91	68	70	n.d.		U36	71	65	121	79	74	n.d.		U36	NR	164	165	168		n.d.		U36	6.8	7.5	7.5	6.9	6.4	n.d.		U36	4.8	NR	4.4	3.9	4.1	n.d.		U36	53.3	NR	61	40.1	61	n.d.
Z29	81	48	122	66	74	n.d.		Z29	44	44	79	58	55	n.d.		Z29	178	181	247	209		n.d.		Z29	6.3	6.9	6.6	6.9	6.4	n.d.		Z29	4.3	4.4	3.8	4.3	4.3	n.d.		Z29	30.5	35.4	29.8	41.1	48.5	n.d.
Mean	74.33	50.33	92.33	74.33	76.67			Mean	72	72.33	95	72.33	72			Mean	167	165.67	193	181.33				Mean	6.47	7.4	7.2	7.13	6.53			Mean	4.4	4.45	4.17	4.03	4.03			Mean	40.93	37.1	43.7	39.7	47.8
SD	13.3	2.1	29	12.7	8.3			SD	28.5	32.6	22.7	12.4	16.1			SD	15.6	14.6	46.8	24				SD	0.3	0.5	0.5	0.4	0.2			SD	0.4	0.1	0.3	0.2	0.3			SD	11.5	2.4	15.9	1.6	13.6
rA2/rhIL-12/alum								rA2/rhIL-12/alum								rA2/rhIL-12/alum								rA2/rhIL-12/alum								rA2/rhIL-12/alum								rA2/rhIL-12/alum
P36	79	82	89	89	93	n.d.		P36	78	60	75	77	80	n.d.		P36	NR	206	284	239	232	n.d.		P36	6.3	6.8	6.9	7.1	6.5	6.7		P36	3.9	NR	4	4	4.1	4.7		P36	33.6	NR	38.9	35.6	38.3	28.5
X32	64	42	145	81	82	n.d.		X32	49	52	129	94	98	n.d.		X32	137	188	171	141	161	n.d.		X32	6.8	7.3	7.2	8	7.1	7.1		X32	4.4	4.6	4.2	4.4	4.1	4.7		X32	27.1	24.6	41.3	35.9	37.6	34.2
AA45	161	66	53	149	99	n.d.		AA45	44	41	45	115	83	n.d.		AA45	149	134	216	178	170	n.d.		AA45	6.8	7	6.7	7.5	6.4	6.3		AA45	4.6	4.6	4.2	3.9	3.9	4.7		AA45	36.8	38.2	41.7	39.7	53.7	39.5
Z81	66	74	75	121	85	n.d.		Z81	38	33	51	74	59	n.d.		Z81	169	166	162	149		n.d.		Z81	6.4	7.5	7	6.6	6.5			Z81	4.1	4.7	4.3	3.2	3.5	n.d.		Z81	23.9	26.2	33.2	28.4	37.7	n.d.
V1	70	54	86	70	68	n.d.		V1	42	57	96	75	59	n.d.		V1	191	186	218	170	174	n.d.		V1	6.7	7.1	7	6.8	6.3	7		V1	4.5	4.5	4.5	4.2	4.2	5.1		V1	33.8	33.8	37.1	27.8	27.8	40.2
Mean	88	63.6	89.6	102	85.4			Mean	50.2	48.6	79.2	87	75.8			Mean	161.5	176	210.2	175.4	184.3			Mean	6.6	7.14	6.96	7.2	6.6	6.8		Mean	4.3	4.6	4.24	3.94	3.96	4.8		Mean	31.04	30.7	38.44	33.48	39.02	35.6
SD	41.2	15.9	34	32.4	11.8			SD	16	11.3	34.4	17.6	16.8			SD	23.7	27.4	48.5	38.6	32.3			SD	0.2	0.3	0.2	0.6	0.3	0.4		SD	0.3	0.1	0.2	0.5	0.3	0.2		SD	5.3	6.4	3.5	5.2	9.3	5.4
rhIL-12/alum								rhIL-12/alum								rhIL-12/alum								rhIL-12/alum								rhIL-12/alum								rhIL-12/alum
S68	59	37	79	61	66	n.d.		S68	64	45	66	60	52	n.d.		S68	130	152	139	155	109	n.d.		S68	6.2	6.3	7.4	6.1	5.8	5.8		S68	3.7	3.7	4.5	3.3	3.2	3		S68	31.2	31.4	42.1	28.8	26.7	23.7
Q58	48	37	81	60	56	n.d.		Q58	69	55	74	57	61	n.d.		Q58	159	173	190	167	182	n.d.		Q58	7.2	7.5	7.6	8.1	6.8	6.6		Q58	4.4	4.5	4.4	4.2	4	4.1		Q58	24.4	16.1	21.7	21.8	22.9	19.9
Z47	75	53	179	65	69	n.d.		Z47	62	55	97	48	42	n.d.		Z47	138	201	179	168	132	n.d.		Z47	6.3	7.2	6.8	7.2	6.8	6		Z47	4.3	4.6	3.7	4	4.2	3.9		Z47	37	34.3	38.4	33	42.3	34.8
V41	119	75	209	96	77	n.d.		V41	156	167	176	69	67	n.d.		V41	104	165	134	129	122	n.d.		V41	7.8	7.5	7.2	7.8	7	7.2		V41	4.9	4.5	3.9	4.2	4.2	4.7		V41	47.7	44.4	39	33.3	39	30.3
X83	53	40	110	72	96	n.d.		X83	48	48	129	109	109	n.d.		X83	NR	246	185	168	149	n.d.		X83	7	7	8	7.9	6.9	6.7		X83	4.8	NR	4.6	404	4.3	4.7		X83	34.8	22.6	36.7	29	29.8	21.8
Mean	70.8	48.4	131.6	70.8	72.8	n.d.		Mean	79.8	74	108.4	68.6	66.2	n.d.		Mean	132.75	187.4	165.4	157.4	138.8	n.d.		Mean	6.9	7.1	7.4	7.42	6.58	6.38		Mean	4.42	4.33	4.22	83.94	3.98	4.08		Mean	35.02	29.76	35.58	29.18	32.14	26.1
SD	28.8	16.3	59.2	14.9	15	n.d.		SD	43.3	52.2	45	23.8	25.7	n.d.		SD	22.7	37.4	26.7	16.8	28.2	n.d.		SD	0.7	0.5	0.4	0.8	0.7	0.7		SD	0.5	0.4	0.4	178.9	0.4	0.7		SD	8.5	10.9	8	4.6	8.2	6.2
Ad5-A2+rA2/rhIL-12/alum								Ad5-A2+rA2/rhIL-12/alum								Ad5-A2+rA2/rhIL-12/alum								Ad5-A2+rA2/rhIL-12/alum								Ad5-A2+rA2/rhIL-12/alum								Ad5-A2+rA2/rhIL-12/alum
Z61	44	40	86	149	47	n.d.		Z61	36	37	103	115	42	n.d.		Z61	NR	147	216	136	104	n.d.		Z61	6.6	7.1	7.6	7.5	6.4	6.3		Z61	4.1	NR	4.6	3.9	4.5	4.2		Z61	42.6	NR	41.9	39.7	32.2	32.6
T16	60	53	38	46	55	n.d.		T16	62	57	41	58	49	n.d.		T16	127	136	138	135	157	n.d.		T16	7	7.3	6.9	6.8	6.5	6.2		T16	4.6	4.5	4	3.7	4	4.2		T16	34.6	34.4	28.5	32.3	29.1	27.1
V90	57	32	54	50	49	n.d.		V90	74	46	74	49	53	n.d.		V90	110	111	134	114	124	n.d.		V90	7.1	6.6	6.8	6.6	6	6		V90	4.7	4.3	4.1	3.8	3.8	4.1		V90	23.9	17.3	26.3	27.8	29	29.7
U77	66	48	84	51	55	n.d.		U77	121	120	115	63	63	n.d.		U77	101	119	126	103	96	n.d.		U77	6.3	7	7.1	6.9	6.1	5.9		U77	4.1	4.4	4.4	4.5	4.3	4.2		U77	33.5	32	28	35.3	35.5	30.8
V59	45	34	70	49	50	n.d.		V59	53	42	66	72	57	n.d.		V59	103	152	NR	133	105	n.d.		V59	6.6	6.8	7.4	6.9	6.5	6.3		V59	4.1	4.3	4.5	NR	4.3	4.4		V59	39.7	34	42.1	36.7	45.4	31
Mean	54.4	41.4	68.2	69	51.2			Mean	71.2	60.4	79.8	71.4	52.8			Mean	110.25	133	153.5	124.2	117.2			Mean	6.72	6.96	7.16	6.94	6.3	6.14		Mean	4.32	4.38	4.32	3.98	4.18	4.22		Mean	34.86	29.43	33.36	34.36	34.24	30.24
SD	9.6	9	21.2	44.8	3.6			SD	36.2	34.1	29.6	25.8	7.9			SD	11.8	17.6	42	14.9	24.5			SD	0.3	0.3	0.3	0.3	0.2	0.2		SD	0.3	0.1	0.3	0.4	0.3	0.1		SD	7.2	8.2	7.9	4.5	6.8	2
Ad5-ASP+rhIL-12/alum								Ad5-ASP+rhIL-12/alum								Ad5-ASP+rhIL-12/alum								Ad5-ASP+rhIL-12/alum								Ad5-ASP+rhIL-12/alum								Ad5-ASP+rhIL-12/alum
S38	42	63	169	64	49	n.d.		S38	42	48	71	52	41	n.d.		S38	147	229	204	184	103	n.d.		S38	7.2	7.4	7.6	7.4	6.4	6.4		S38	4.7	4.7	4.6	4.3	4.1	4.4		S38	41	44.2	44.6	39.2	31.1	26.5
Z73	55	47	81	146	90	n.d.		Z73	97	52	85	107	107	n.d.		Z73	192	157	233	147	155	n.d.		Z73	6.9	7.4	6.6	7.1	6.5	6.2		Z73	4.6	4.8	4.3	4.3	4.4	4.3		Z73	36	40.2	43.3	46.7	42.1	29.7
Z33	50	53	126	68	77	n.d.		Z33	60	79	128	62	62	n.d.		Z33	164	260	198	173	145	n.d.		Z33	7.6	7.2	7.3	7.2	6.5	6.4		Z33	4.7	4.8	4.1	4.3	4.3	4.2		Z33	38.3	40	39.1	36	46.1	25.9
N40	48	33	42	63	48	n.d.		N40	47	49	52	56	35	n.d.		N40	155	159	160	155	162	n.d.		N40	7.5	7.5	7	6.5	6.2	6.4		N40	4.3	4.9	4	3.8	3.8	3.8		N40	33.7	22.6	26.6	20.9	23	26.6
V17	30	31	70	124	96	n.d.		V17	38	37	52	125	105	n.d.		V17	172	170	273	231	214	n.d.		V17	7.9	7.9	7.6	7.9	7.2	7.2		V17	5	5.2	4.7	4.1	4.1	4.8		V17	44.6	33.6	36.7	28.4	40.6	31.2
Mean	45	45.4	97.6	93	72	n.d.		Mean	56.8	53	77.6	80.4	70	n.d.		Mean	166	195	213.6	178	155.8	n.d.		Mean	7.42	7.5	7.22	7.22	6.56	6.52		Mean	4.66	4.88	4.34	4.16	4.14	4.3		Mean	38.72	36.12	38.06	34.24	36.58	28
SD	9.6	13.5	50.1	39.2	22.5			SD	24	15.6	31.4	33.3	34.4			SD	17.3	46.8		42.2	33			SD	0.4	0.3	0.4	0.5	0.4	0.4		SD	0.3	0.2	0.3	0.2	0.2	0.4		SD	4.3	8.5	7.2	9.9	9.4	2.3
DNA-A2+Ad5-A2								DNA-A2+Ad5-A2								DNA-A2+Ad5-A2								DNA-A2+Ad5-A2								DNA-A2+Ad5-A2								DNA-A2+Ad5-A2
T10	49	27	102	52	40	n.d.		T10	81	39	43	50	34	n.d.		T10	111	122	120	125		n.d.		T10	7.2	6.9	6.4	6.5	6.1	n.d.		T10	3.9	4.1	3.5	3.7	4.3	n.d.		T10	15.8	28.4	33	25.9	27.3	n.d.
Z79	47	43	122	57	51	n.d.		Z79	46	56	117	52	43	n.d.		Z79	197	236	201	174		n.d.		Z79	6.9	7.3	6.9	6.5	6	n.d.		Z79	4.6	4.8	4.2	4.2	4.3	n.d.		Z79	44.9	30.1	38	50.8	42.2	n.d.
U20	43	48	179	107	90	n.d.		U20	90	70	87	105	77	n.d.		U20	171	161	197	185		n.d.		U20	7.1	7.6	7.9	7.2	6.4	n.d.		U20	4.5	4.6	4.6	4	3.7	n.d.		U20	28.5	28.5	39.1	28.8	33.2	n.d.
V76	50	50	139	74	69	n.d.		V76	70	47	66	55	52	n.d.		V76	147	153	151	150		n.d.		V76	7.7	7.2	7.4	7.4	6.4	n.d.		V76	5.1	4.8	4.4	4.2	4.1	n.d.		V76	37.3	42.3	53.4	46.2	47.6	n.d.
Z17	66	54	87	100	75	n.d.		Z17	59	50	60	65	55	n.d.		Z17	154	162	7.2	182		n.d.		Z17	7	7.5	7.2	7.2	6.5	n.d.		Z17	4.8	4.8	4.4	4.3	4.3	n.d.		Z17	38.5	31.1	35.4	35.5	40.8	n.d.
Mean	51	44.4	125.8	78	65	n.d.		Mean	69.2	52.4	74.6	65.4	52.2	n.d.		Mean	156	166.8	135.24	163.2		n.d.		Mean	7.18	7.3	7.16	6.96	6.28			Mean	4.58	4.62	4.22	4.08	4.14			Mean	33	32.08	39.78	37.44	38.22
SD	8.8	10.5	35.7	24.8	19.8			SD	17.4	11.6	28.4	22.9	16.1			SD	31.7	42	79.1	25.4				SD	0.3	0.3	0.6	0.4	0.2			SD	0.4	0.3	0.4	0.2	0.3			SD	11.3	5.8	8	10.8	8
DAN-wt+Ad5-ASP								DAN-wt+Ad5-ASP								DAN-wt+Ad5-ASP								DAN-wt+Ad5-ASP								DAN-wt+Ad5-ASP								DAN-wt+Ad5-ASP
X20	44	46	129	50	52	n.d.		X20	46	55	100	49	55	n.d.		X20	175	176	185	173		n.d.		X20	6.5	7	6.9	7.1	6.4	n.d.		X20	4.1	4.2	3.8	4.1	3.9	n.d.		X20	30.1	44.3	41.3	45.9	35.6	n.d.
AA5	53	76	140	88	87	n.d.		AA5	67	84	116	82	68	n.d.		AA5	NR	185	232	198		n.d.		AA5	7.3	6.8	6.8	8	6.8	n.d.		AA5	4.9	3.8	4.1	4.4	4.2	n.d.		AA5	37.8	NR	52.2	47.6	47.5	n.d.
N14	57		84	94	88	n.d.		N14	50		49	69	67	n.d.		N14		161	162	199		n.d.		N14	7.7		7.1	7.6	6.8	n.d.		N14	4.8		4	3.5	4.1	n.d.		N14	32.3		34.7	38.3	6.6	n.d.
M18	40	34	172	35	53	n.d.		M18	48	39	59	37	46	n.d.		M18	210	231	181	163		n.d.		M18	7.5	7.9	6.1	71	6.8	n.d.		M18	4.5	4.6	3	3.7	3.6	n.d.		M18	30.4	25.1		31.8	30	n.d.
U31	67	69	119	74	90	n.d.		U31	114	81	132	82	86	n.d.		U31	138	147	160	153		n.d.		U31	7.8	7.3	7.2	7.2	6.8	n.d.		U31	5.6	4.7	4.3	4.6	4.6	n.d.		U31	38.2	43.6	49.2	57.1	47.4	n.d.
Mean	54.7	51.5	125	67.7	77			Mean	70.7	60	80	62.7	66.3			Mean	174	179.7	167.7	171.7				Mean	7.7	7.6	6.8	28.6	6.8			Mean	5	4.7	3.8	3.9	4.1			Mean	33.6	34.4	42	42.4	28
SD	10.7	19.6	32	25.1	19.7			SD	28.6	21.5	36	20.2	15.1			SD	36	32	29	20.7				SD	0.5	0.5	0.4	28.4	0.2			SD	0.6	0.4	0.5	0.5	0.4			SD	4	10.9	7.9	9.6	16.8
DP
